# Supplementary material
Source: publisher site journal article supplement (https://www.dovepress.com/article/318678)
Supplement: Supplementary file 1 [file get_supplementary_file.php]

# Supplementary information

ORIGINAL RESEARCH

Rong Ma, Nuernisha Alifu et al

## **Indocyanine green-based theranostic nanoplatform for NIR fluorescence image-guided chemo/photothermal therapy of cervical cancer**

Rong Ma<sup>#1</sup>, Nuernisha Alifu<sup>#2</sup>, Zhong Du<sup>1</sup>, Shuang Chen<sup>1</sup>, Youqiang Heng<sup>1</sup>, Jing Wang<sup>1</sup>, Lijun Zhu<sup>2</sup>, Cailing Ma<sup>\*1</sup> and Xueliang Zhang<sup>\*2</sup>

<sup>1</sup>State Key Laboratory of Pathogenesis, Prevention, and Treatment of High Incidence

Diseases in Central Asia /Department of Gynecology, The First Affiliated Hospital of Xinjiang Medical University. Urumqi, China;

<sup>2</sup>State Key Laboratory of Pathogenesis, Prevention and Treatment of High Incidence

Diseases in Central Asia, School of Medical Engineering and Technology, Xinjiang Medical University, Urumqi, China

<sup>#</sup>These authors contributed equally to this work

Correspondence: Cailing Ma

State Key Laboratory of Pathogenesis, Prevention, and Treatment of High Incidence

Diseases in Central Asia /Department of Gynecology, The First Affiliated Hospital of Xinjiang

Medical University. Urumqi 830054, China

Tel: +86-13009661999

Email: hymcl13009661999@126.com

Correspondence: Xueliang Zhang

State Key Laboratory of Pathogenesis, Prevention and Treatment of High Incidence Diseases

in Central Asia, School of Medical Engineering and Technology, Xinjiang Medical University,

Urumqi 830011, China

Email:shuxue2456@126.com

Tel: +86-18999978069

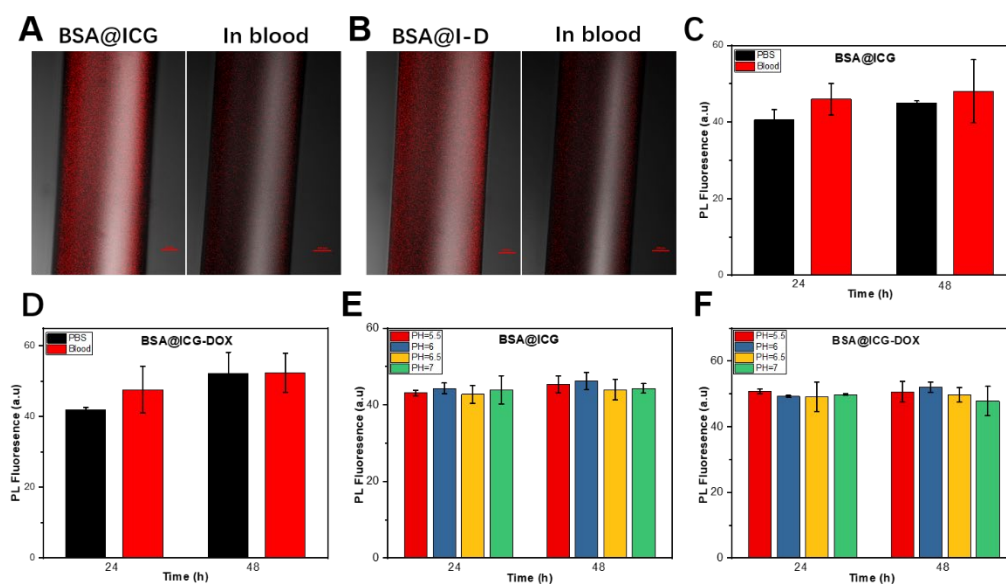

**Figure S1** Fluorescence stability of BSA@ICG and BSA@ICG-DOX NPs. (A) CLSM fluorescence images of BSA@ICG NPs in aqueous dispersion and in the blood (B) CLSM fluorescence images of BSA@ICG-DOX NPs in aqueous dispersion and in the blood (C) Fluorescence intensity of BSA@ICG NPs in blood at 24 h and 48 h. (D) Fluorescence intensity of BSA@ICG-DOX NPs in blood at 24 h and 48 h. (E) Fluorescence intensity of BSA@ICG NPs in acidic environment. (pH=5.5, 6, 6.5 and 7 was measured at different time points for 24 h and 48 h). (F) Fluorescence intensity of BSA@ICG-DOX NPs in acidic environment. (pH=5.5, 6, 6.5 and 7 was measured at different time points for 24 h and 48 h) (n = 3 in each group, under 640 nm laser irradiation)

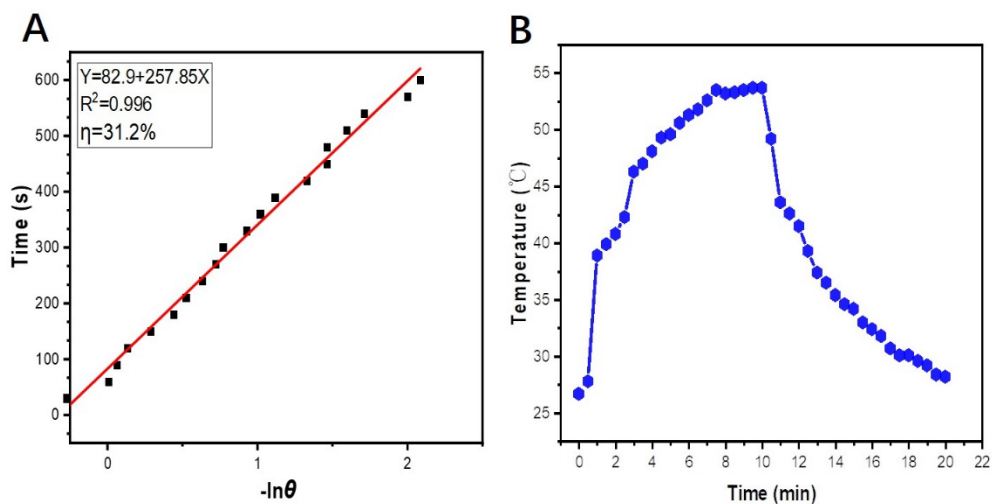

**Figure. S2** (A) Linear time data versus  $-\ln\theta$  obtained from the cooling period of BSA @ICG NPs in aqueous dispersion. (B) Temperature variation of ICG@BSA NPs aqueous dispersion upon single cycle of NIR laser irradiation.

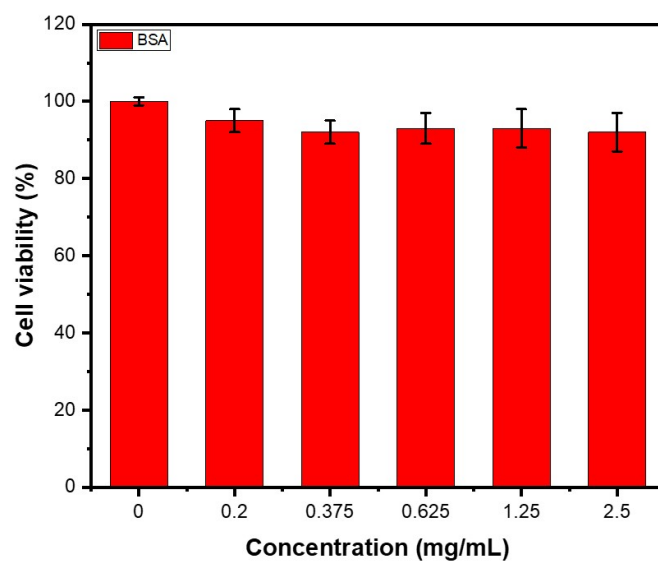

**Figure S3** Cytoviability of HeLa cells after incubation with BSA at different concentrations for 24 h. Data are expressed as mean  $\pm$  S.D. ( $n = 6$  in each concentration)

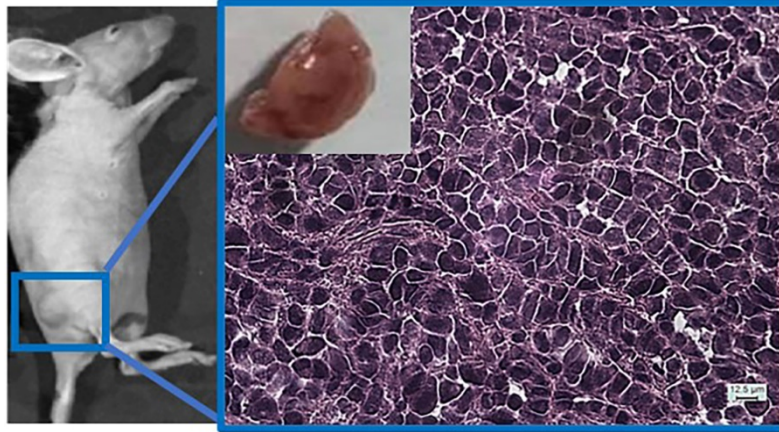

**Figure S4** Image of cervical tumor-bearing mouse (left) and H&E microscopic image of tumour section

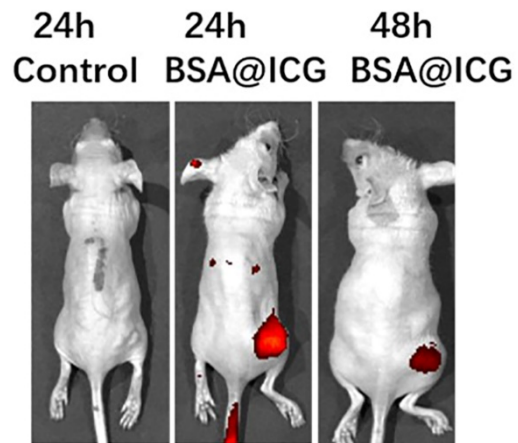

**Figure S5** *In vivo* NIR Fluorescence images of Tumour-bearing nude mice treated with BSA@ICG NPs at 24h and 48h. Excitation: 745 nm. Emission: 840 nm.

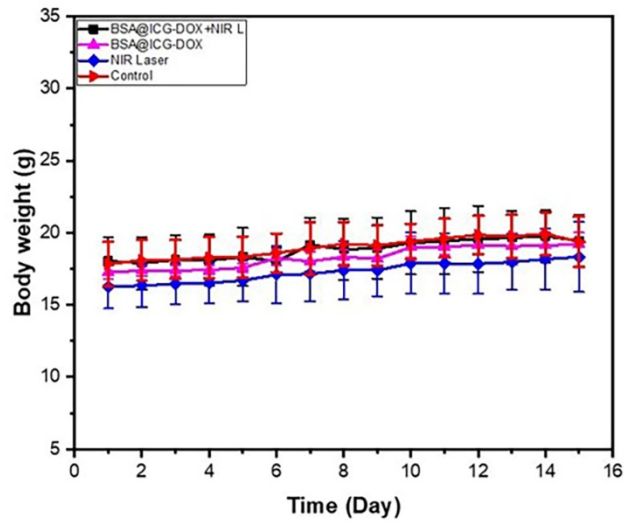

**Figure S6** Relative tumor weight in 2 weeks after different treatments.

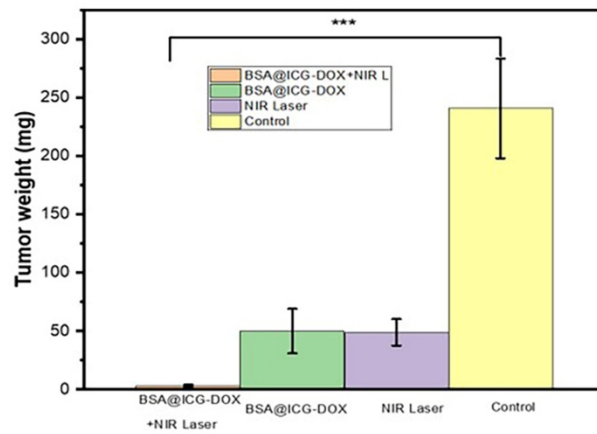

**Figure S7** Body weight of HeLa cell-xenografted nude mice in groups after different treatments. Data were displayed as the mean  $\pm$  SD (n =4)
